# Supplementary material for: A lattice-matched interface betweenin situ/artificial SEIs inhibiting SEI decomposition for enhanced lithium storage
Source: Royal Society of Chemistry journal article supplement (doi:10.1039/d0ta00448k), 2020-01-01
Supplement: d0ta00448k1.pdf [file d0ta00448k1.pdf]

## Supporting Information

### **A Lattice-matched Interface between In-situ/Artificial SEIs Inhibiting SEI Decomposition for Enhanced Lithium Storage**

Xiaosheng Song,<sup>a,†</sup> Shiyu Li,<sup>b,‡</sup> Xifei Li,<sup>c,d,\*</sup> Yaohui Zhang,<sup>e,\*</sup> Xiaobing Wang,<sup>a</sup> Zhimin Bai,<sup>f</sup>

Hirbod Maleki Kheimeh Sari,<sup>d</sup> Yong Zhao,<sup>a,\*</sup> Jiujuun Zhang<sup>d,g</sup>

<sup>a</sup>*Key Lab for Special Functional Materials of Ministry of Education; National & Local Joint Engineering Research Center for High-efficiency Display and Lighting Technology; School of Materials Science and Engineering; Collaborative Innovation Center of Nano Functional Materials and Applications; Henan University, Kaifeng, Henan, 475004, P. R. China E-mail: [zhaoyong@henu.edu.cn](mailto:zhaoyong@henu.edu.cn)*

<sup>b</sup>*College of Energy, Soochow Institute for Energy and Materials InnovationS, Soochow University, Suzhou, 215006, P. R. China*

<sup>c</sup>*Energy & Materials Engineering Centre, College of Physics and Materials Science, Tianjin Normal University, Tianjin, 300387, P. R. China, E-mail: [xfli2011@hotmail.com](mailto:xfli2011@hotmail.com)*

<sup>d</sup>*Xi'an Key Laboratory of New Energy Materials and Devices, Institute of Advanced Electrochemical Energy & School of Materials Science and Engineering, Xi'an University of Technology, Xi'an, Shaanxi 710048, P. R. China*

<sup>e</sup>*School of Physics, Harbin Institute of Technology, Harbin, Heilongjiang, 150001, P. R. China E-mail: [hitcrazyzyh@hit.edu.cn](mailto:hitcrazyzyh@hit.edu.cn)*

<sup>f</sup>*Beijing Key Laboratory of Materials Utilization of Nonmetallic Minerals and Solid Wastes; Nanomaterials and Energy Lab; National Laboratory of Mineral Materials; School of Materials Science and Technology, China University of Geosciences, Beijing, 100083, P. R. China*

<sup>g</sup>*Institute for Sustainable Energy/College of Sciences, Shanghai University, Shanghai, 200444, P. R. China.*

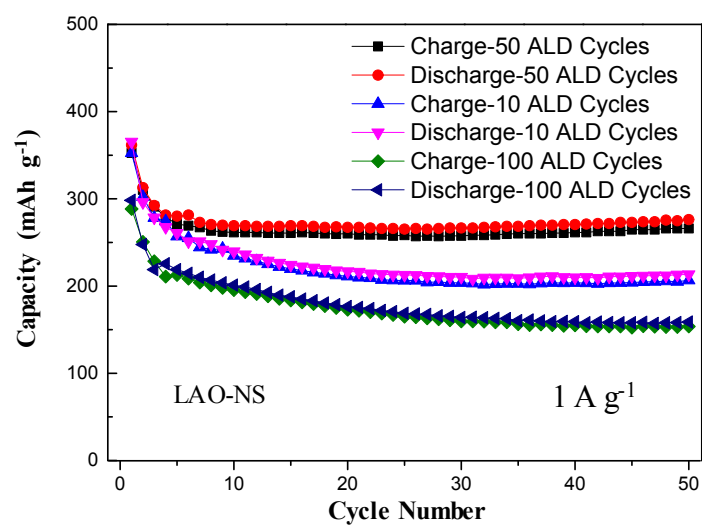

**Figure S1** Cycling performance at 1 A g<sup>-1</sup> of LAO-NS for 10, 50, 100 ALD cycles, respectively.

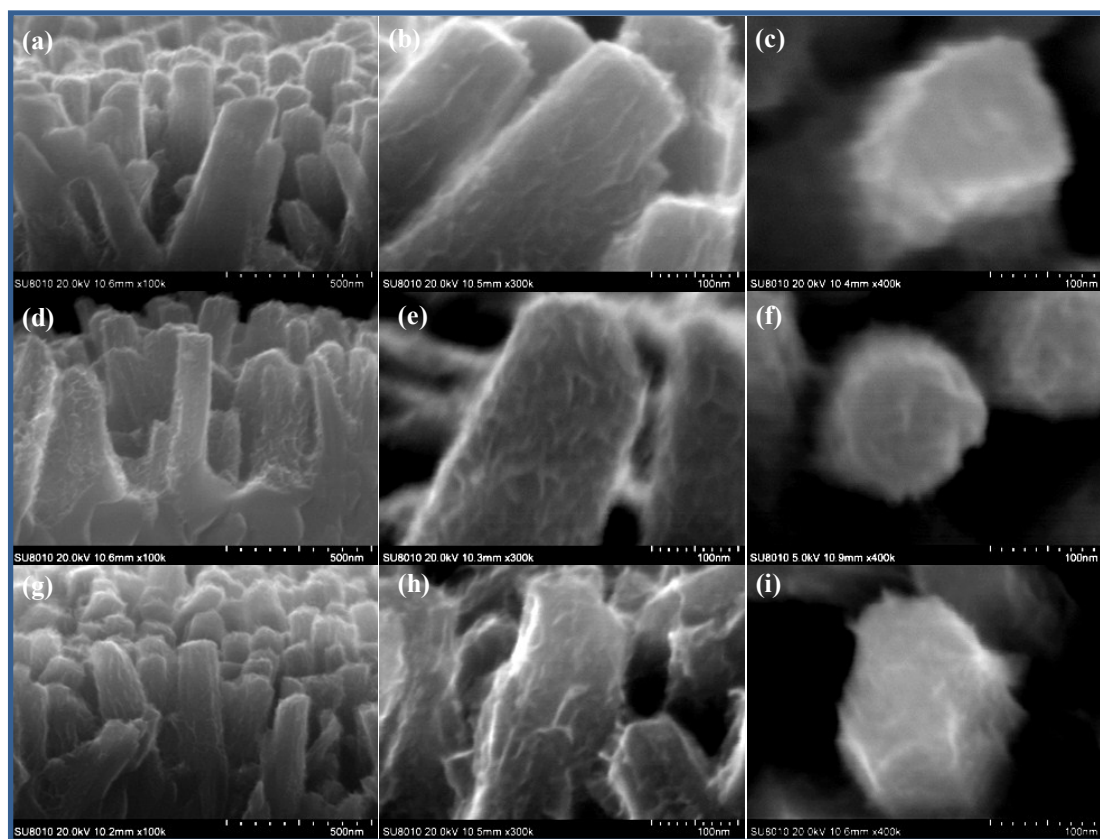

**Figure S2** Morphologies of (a, b, and c) NS, (d, e, and f) AO-NS, (g, h, and i) LAO-NS. (a, d, and g): side view, (b, e, and h): magnified side view, and (c, f, and i): top view of (NS, AO-NS, and LAO-NS), respectively.

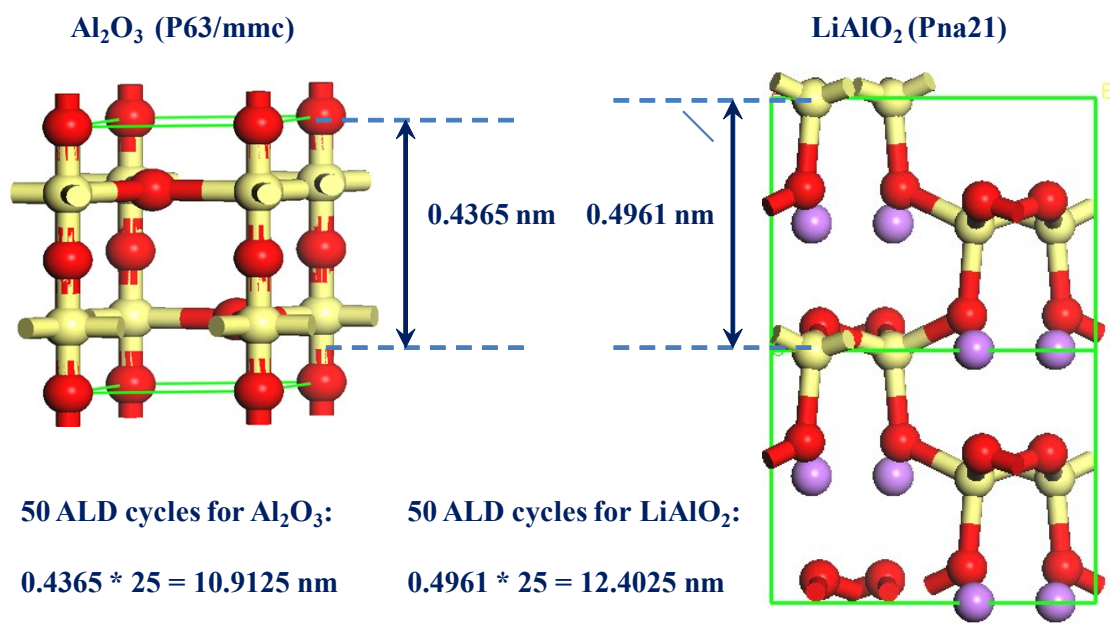

**Figure S3** Theoretical thickness calculation of Al<sub>2</sub>O<sub>3</sub> with P63/mmc and LiAlO<sub>2</sub> with Pna21 for 50 ALD cycles.

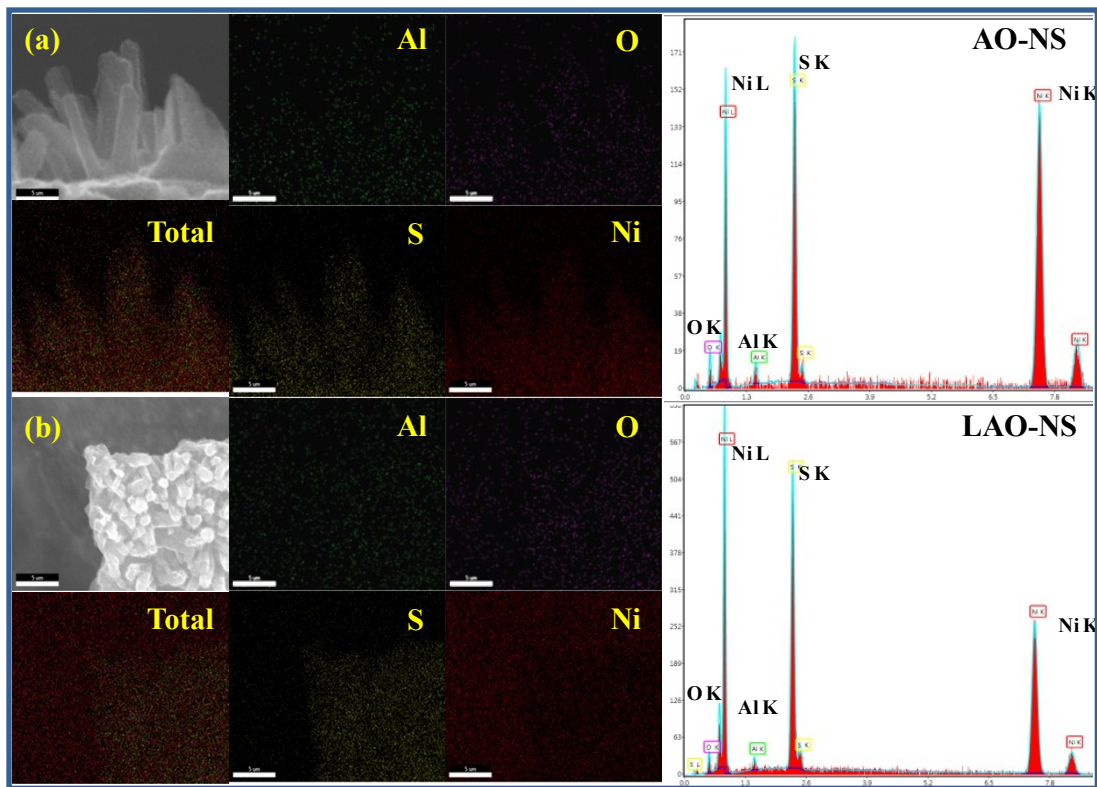

Figure S4 EDS analysis of (a) AO-NS and (b) LAO-NS.

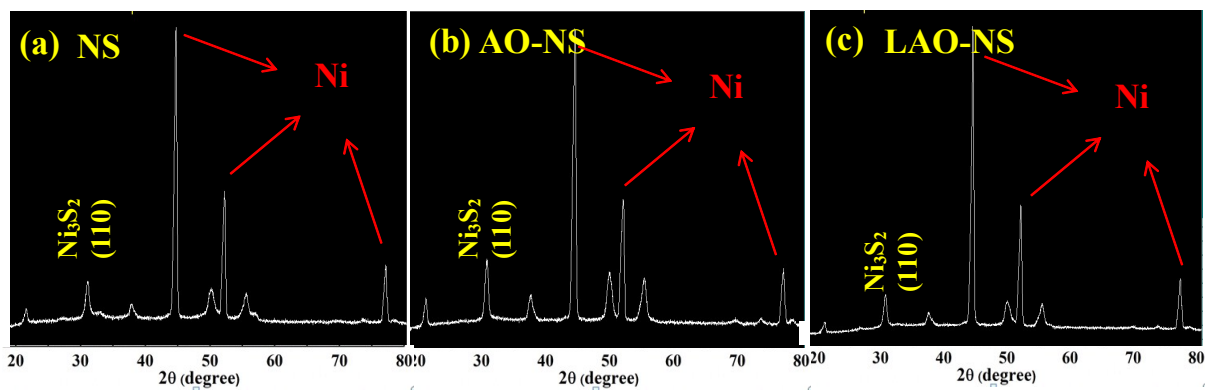

**Figure S5** XRD patterns of (a) NS, (b) AO-NS, and (c) LAO-NS, referring to heazlewoodite  $\text{Ni}_3\text{S}_2$ .

**Table S1.** Comparison of the capacity retention (refer to the capacity of the 2<sup>nd</sup> cycle) of ours LAO-NS to other reported nickel sulfide based electrodes for LIBs.

| <b>Capacity retention /%</b>               | <b>Ours</b>   |                |                 |                 |                 |                 |                 |                 |  |
|--------------------------------------------|---------------|----------------|-----------------|-----------------|-----------------|-----------------|-----------------|-----------------|--|
|                                            | <b>LAO-NS</b> | <b>Ref. 28</b> | <b>Ref. 30a</b> | <b>Ref. 30b</b> | <b>Ref. 30c</b> | <b>Ref. 30d</b> | <b>Ref. 30e</b> | <b>Ref. 30f</b> |  |
| <b>Current density (mA g<sup>-1</sup>)</b> | 50            | 100            | 890             | 45              | 50              | 170             | 50              | 500             |  |
| <b>After 20 cycles</b>                     | 98.4          |                | 80.8            |                 |                 |                 | 82.7            |                 |  |
| <b>After 60 cycles</b>                     | 98.5          | 89.0           |                 |                 | 90.3            |                 |                 |                 |  |
| <b>After 100 cycles</b>                    | 98.8          |                |                 | 74.4            |                 | 95.3            |                 | 96.0            |  |

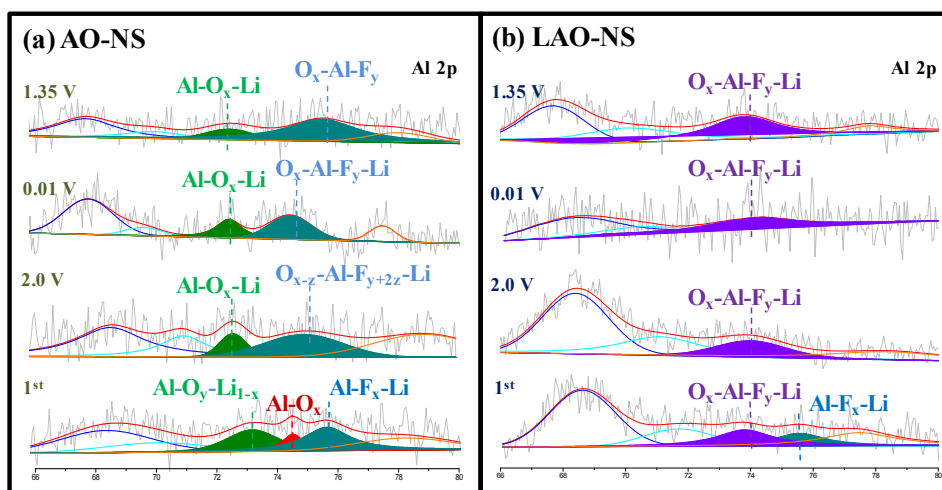

**Figure S6** Al 2p High-resolution XPS spectra of (a) AO-NS and (b) LAO-NS after discharging to 1.35 V, 0.01 V, and recharging to 2.0 V and 3.0 V, respectively.



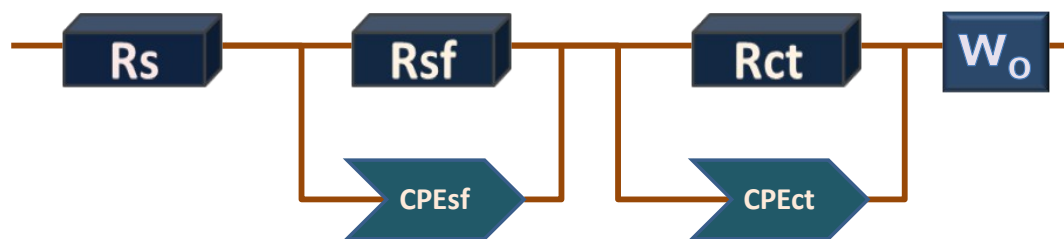

**Figure S7** Equivalent circuit used to simulate resultant Nyquist plots.

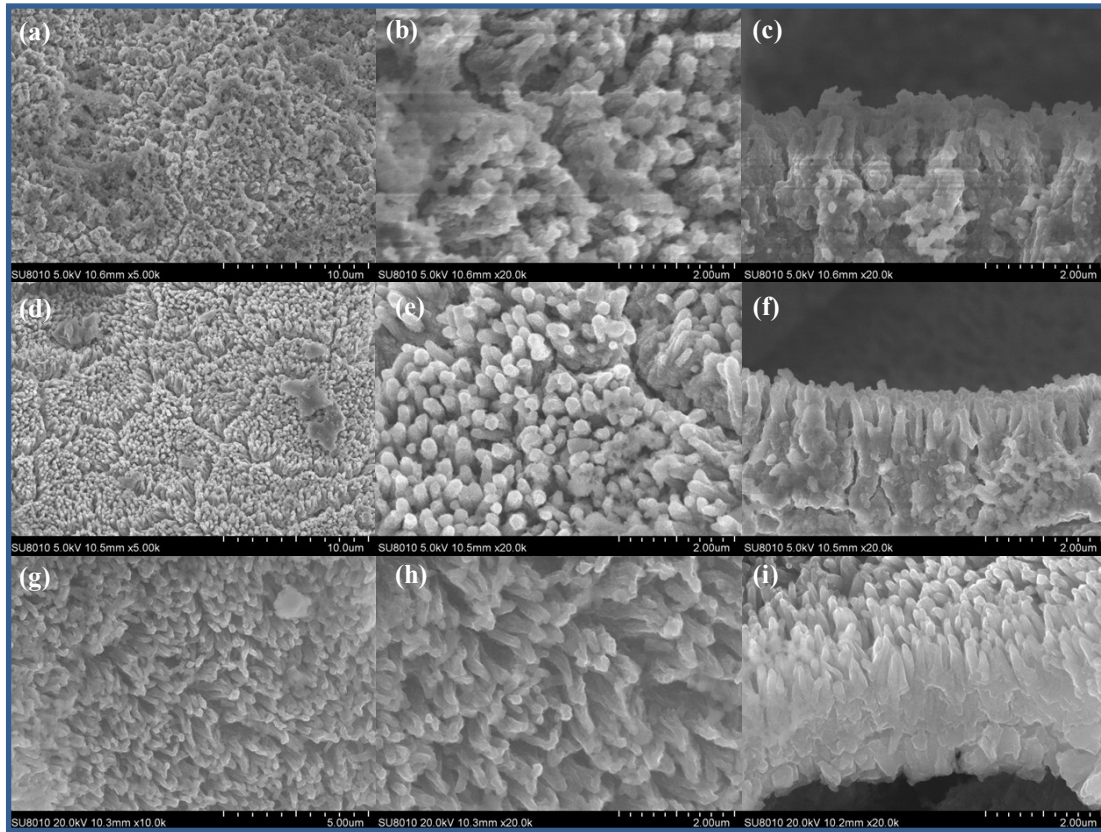

**Figure S8** Morphologies of (a, b, and c) NS, (d, e, and f) AO-NS, (g, h, and i) LAO-NS after 100 cycles. (a, d, and g): top view, (b, e, and h): magnified top view, and (c, f, and i): side view of (NS, AO-NS, and LAO-NS), respectively.
